# Supplementary material for: Revisiting the reanalysis-model discrepancy in Southern Hemisphere winter storm track trends
Source: Springer Nature journal article supplement (doi:10.1038/s41612-024-00801-3), 2024-10-19
Supplement: MOESM1 [file 41612_2024_801_MOESM1_ESM.pdf]

1           Supplementary information for: Revisiting the  
2 reanalysis-model discrepancy in Southern Hemisphere  
3           winter storm track trends

4    Joonsuk M. Kang<sup>1</sup>, Tiffany A. Shaw<sup>1,2</sup>, Sarah M. Kang<sup>2</sup>, Isla R. Simpson<sup>3</sup> Yue Yu<sup>4</sup>

5    <sup>1</sup>Department of the Geophysical Sciences, The University of Chicago, Chicago, IL

6    <sup>2</sup>Max Planck Institute for Meteorology, Hamburg, Germany

7    <sup>3</sup>Climate and Global Dynamics Laboratory, NSF National Center of Atmospheric Research, Boul-  
8 der, CO

9    <sup>4</sup>State Key Laboratory of Satellite Ocean Environment Dynamics, Second Institute of Oceanogra-  
10 phy, Ministry of Natural Resources, Hangzhou, China

11

Table S1: Summary of unprocessed time frequency and spatial grids of the datasets used in the study. The models that are only included in the CMIP6 and AMIP6 multi model ensemble are superscripted in *c* or *a*, respectively.

| Dataset                        | Time frequency | Number of pressure levels<br>(highest pressure level) | Horizontal resolution<br>[longitude×latitude] |
|--------------------------------|----------------|-------------------------------------------------------|-----------------------------------------------|
| Reanalysis                     |                |                                                       |                                               |
| CFSR/CFSv2                     | Six-hourly     | 37 (1 hPa)                                            | $0.5^{\circ} \times 0.5^{\circ}$              |
| ERA-Interim                    | Six-hourly     | 37 (1 hPa)                                            | $1.5^{\circ} \times 1.5^{\circ}$              |
| ERA5                           | Six-hourly     | 37 (1 hPa)                                            | $0.25^{\circ} \times 0.25^{\circ}$            |
| JRA-3Q                         | Six-hourly     | 45 (0.01 hPa)                                         | $0.375^{\circ} \times 0.375^{\circ}$          |
| JRA-55                         | Six-hourly     | 37 (1 hPa)                                            | $1.25^{\circ} \times 1.25^{\circ}$            |
| MERRA1                         | Six-hourly     | 42 (0.1 hPa)                                          | $0.67^{\circ} \times 0.5^{\circ}$             |
| MERRA2                         | Six-hourly     | 42 (0.1 hPa)                                          | $0.625^{\circ} \times 0.5^{\circ}$            |
| NCEP2                          | Six-hourly     | 17 (10 hPa)                                           | $2.5^{\circ} \times 2.5^{\circ}$              |
| CMIP6 and AMIP6 models         |                |                                                       |                                               |
| ACCESS-CM2                     | Daily-mean     | 8 (10 hPa)                                            | $1.875^{\circ} \times 1.25^{\circ}$           |
| ACCESS-ESM1-5                  | Daily-mean     | 8 (10 hPa)                                            | $1.875^{\circ} \times 1.25^{\circ}$           |
| BCC-CSM2-MR                    | Daily-mean     | 8 (10 hPa)                                            | $1.125^{\circ} \times 1.125^{\circ}$          |
| CAMS-CSM1-0 <sup>a</sup>       | Daily-mean     | 8 (10 hPa)                                            | $1.125^{\circ} \times 1.125^{\circ}$          |
| CESM2 <sup>a</sup>             | Daily-mean     | 8 (10 hPa)                                            | $1.25^{\circ} \times 0.938^{\circ}$           |
| CESM2-FV2 <sup>a</sup>         | Daily-mean     | 8 (10 hPa)                                            | $2.5^{\circ} \times 1.875^{\circ}$            |
| CESM2-WACCM                    | Daily-mean     | 8 (10 hPa)                                            | $1.25^{\circ} \times 0.938^{\circ}$           |
| CESM2-WACCM-FV2 <sup>a</sup>   | Daily-mean     | 8 (10 hPa)                                            | $2.5^{\circ} \times 1.875^{\circ}$            |
| CMCC-CM2-HR4 <sup>a</sup>      | Daily-mean     | 8 (10 hPa)                                            | $1.25^{\circ} \times 0.938^{\circ}$           |
| CMCC-CM2-SR5                   | Daily-mean     | 8 (10 hPa)                                            | $1.25^{\circ} \times 0.938^{\circ}$           |
| CMCC-ESM2 <sup>c</sup>         | Daily-mean     | 8 (10 hPa)                                            | $1.25^{\circ} \times 0.938^{\circ}$           |
| CanESM5                        | Daily-mean     | 8 (10 hPa)                                            | $2.812^{\circ} \times 2.812^{\circ}$          |
| EC-Earth3                      | Daily-mean     | 8 (10 hPa)                                            | $0.703^{\circ} \times 0.703^{\circ}$          |
| EC-Earth3-CC                   | Daily-mean     | 8 (10 hPa)                                            | $0.703^{\circ} \times 0.703^{\circ}$          |
| EC-Earth3-AerChem <sup>a</sup> | Daily-mean     | 8 (10 hPa)                                            | $0.703^{\circ} \times 0.703^{\circ}$          |
| EC-Earth3-Veg                  | Daily-mean     | 8 (10 hPa)                                            | $0.703^{\circ} \times 0.703^{\circ}$          |
| EC-Earth3-Veg-LR               | Daily-mean     | 8 (10 hPa)                                            | $1.125^{\circ} \times 1.125^{\circ}$          |
| FGOALS-f3-L <sup>a</sup>       | Daily-mean     | 8 (10 hPa)                                            | $1.25^{\circ} \times 1.0^{\circ}$             |
| FGOALS-g3                      | Daily-mean     | 8 (10 hPa)                                            | $2.0^{\circ} \times 2.25^{\circ}$             |
| GFDL-CM4                       | Daily-mean     | 8 (10 hPa)                                            | $2.5^{\circ} \times 2.0^{\circ}$              |
| IITM-ESM                       | Daily-mean     | 8 (10 hPa)                                            | $1.875^{\circ} \times 1.915^{\circ}$          |
| INM-CM4-8                      | Daily-mean     | 8 (10 hPa)                                            | $2.0^{\circ} \times 1.5^{\circ}$              |
| INM-CM5-0                      | Daily-mean     | 8 (10 hPa)                                            | $2.0^{\circ} \times 1.5^{\circ}$              |
| IPSL-CM6A-LR                   | Daily-mean     | 8 (10 hPa)                                            | $2.5^{\circ} \times 1.268^{\circ}$            |
| KACE-1-0-G <sup>c</sup>        | Daily-mean     | 8 (10 hPa)                                            | $1.875^{\circ} \times 1.25^{\circ}$           |
| MIROC6                         | Daily-mean     | 8 (10 hPa)                                            | $1.406^{\circ} \times 1.406^{\circ}$          |
| MPI-ESM1-2-HAM <sup>a</sup>    | Daily-mean     | 8 (10 hPa)                                            | $1.875^{\circ} \times 1.875^{\circ}$          |
| MPI-ESM1-2-HR                  | Daily-mean     | 8 (10 hPa)                                            | $0.938^{\circ} \times 0.938^{\circ}$          |
| MPI-ESM1-2-LR                  | Daily-mean     | 8 (10 hPa)                                            | $1.875^{\circ} \times 1.875^{\circ}$          |
| MRI-ESM2-0                     | Daily-mean     | 8 (10 hPa)                                            | $1.125^{\circ} \times 1.125^{\circ}$          |
| NESM3                          | Daily-mean     | 8 (10 hPa)                                            | $1.875^{\circ} \times 1.875^{\circ}$          |
| NorESM2-LM                     | Daily-mean     | 8 (10 hPa)                                            | $2.5^{\circ} \times 1.875^{\circ}$            |
| NorESM2-MM <sup>c</sup>        | Daily-mean     | 8 (10 hPa)                                            | $1.25^{\circ} \times 0.938^{\circ}$           |
| SAM0-UNICON <sup>a</sup>       | Daily-mean     | 8 (10 hPa)                                            | $1.25^{\circ} \times 0.938^{\circ}$           |
| TaiESM1                        | Daily-mean     | 8 (10 hPa)                                            | $1.25^{\circ} \times 0.938^{\circ}$           |

Table S2: Percentile rank of individual reanalysis in the multi-model or large ensemble simulations.

Lower ranks correspond to larger trends.

| Rank (%)            | CFSR  | ERA1 | ERA5 | JRA3Q | JRA55 | MERRA1 | MERRA2 | NCEP2 |
|---------------------|-------|------|------|-------|-------|--------|--------|-------|
| Zonal mean          |       |      |      |       |       |        |        |       |
| CMIP6               | 23.1  | 3.8  | 3.8  | 3.8   | 0.0   | 96.2   | 34.6   | 0.0   |
| AMIP6               | 53.1  | 25.0 | 18.8 | 6.2   | 0.0   | 93.8   | 68.8   | 0.0   |
| South Pacific       |       |      |      |       |       |        |        |       |
| CMIP6               | 50.0  | 3.8  | 3.8  | 3.8   | 0.0   | 11.5   | 11.5   | 0.0   |
| AMIP6               | 87.5  | 62.5 | 50.0 | 46.9  | 21.9  | 68.8   | 71.9   | 0.0   |
| CESM2 zonal mean    |       |      |      |       |       |        |        |       |
| CESM2-LE            | 58.0  | 2.0  | 0.0  | 0.0   | 0.0   | 76.0   | 56.0   | 0.0   |
| GOGA                | 80.0  | 20.0 | 10.0 | 10.0  | 0.0   | 100.0  | 80.0   | 0.0   |
| SOPACE              | 76.2  | 14.3 | 9.5  | 0.0   | 0.0   | 90.5   | 71.4   | 0.0   |
| PacPACE             | 60.0  | 10.0 | 10.0 | 0.0   | 0.0   | 80.0   | 60.0   | 0.0   |
| SUM                 | 86.0  | 20.0 | 14.0 | 8.0   | 0.0   | 94.0   | 86.0   | 0.0   |
| CESM2 South Pacific |       |      |      |       |       |        |        |       |
| CESM2-LE            | 64.0  | 8.0  | 6.0  | 6.0   | 2.0   | 20.0   | 32.0   | 0.0   |
| GOGA                | 100.0 | 60.0 | 40.0 | 40.0  | 10.0  | 80.0   | 90.0   | 0.0   |
| SOPACE              | 90.5  | 4.8  | 0.0  | 0.0   | 0.0   | 19.0   | 28.6   | 0.0   |
| PacPACE             | 90.0  | 40.0 | 30.0 | 20.0  | 0.0   | 60.0   | 80.0   | 0.0   |
| SUM                 | 94.0  | 46.0 | 34.0 | 34.0  | 16.0  | 56.0   | 68.0   | 0.0   |

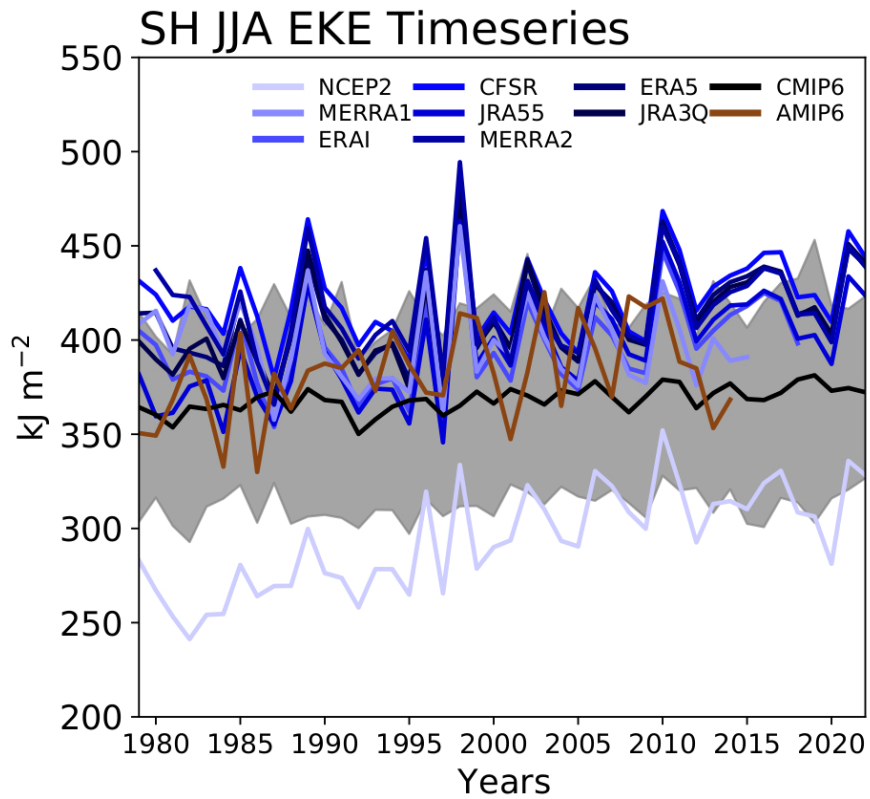

Figure S1: **Time evolution of SH winter storminess across reanalyses and models.** a Time series of SH JJA EKE ( $40\text{--}75^\circ\text{S}$ ) in 8 reanalysis datasets (blue colors) and in CMIP6 (black) and AMIP6 (brown) multi-model-mean. The gray shading indicates 10–90% range of CMIP6 ensemble storminess distribution.

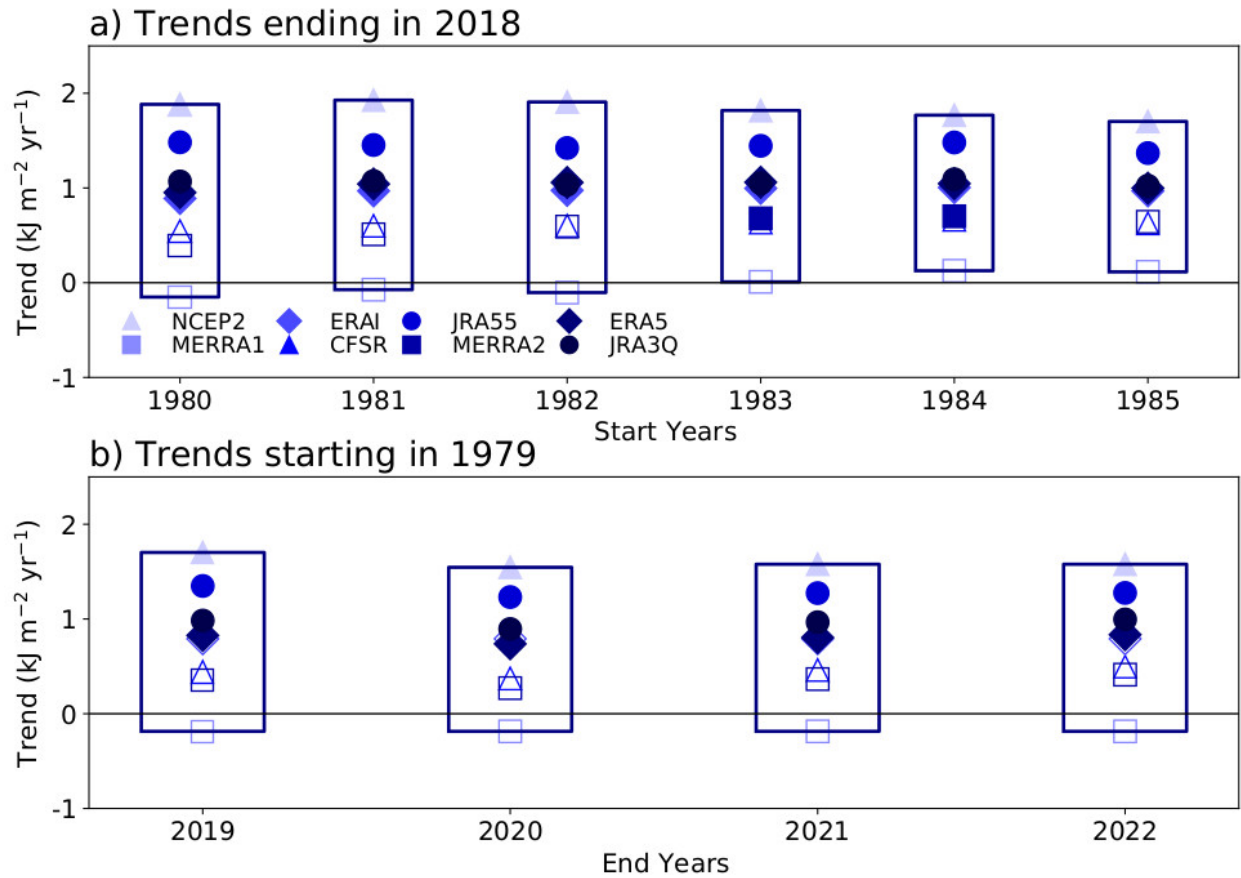

Figure S2: **Reanalysis uncertainty for trends calculated from different start years to different end years.** **a** Linear trends of SH JJA EKE ( $40\text{--}75^\circ\text{S}$ ) in 8 reanalysis datasets (blue colors) from different start years to 2018 (or the last available year). **b** Same as **a**, but for trends starting from 1979 to different end years (or the last available year). The box represents the full spread of reanalysis trends

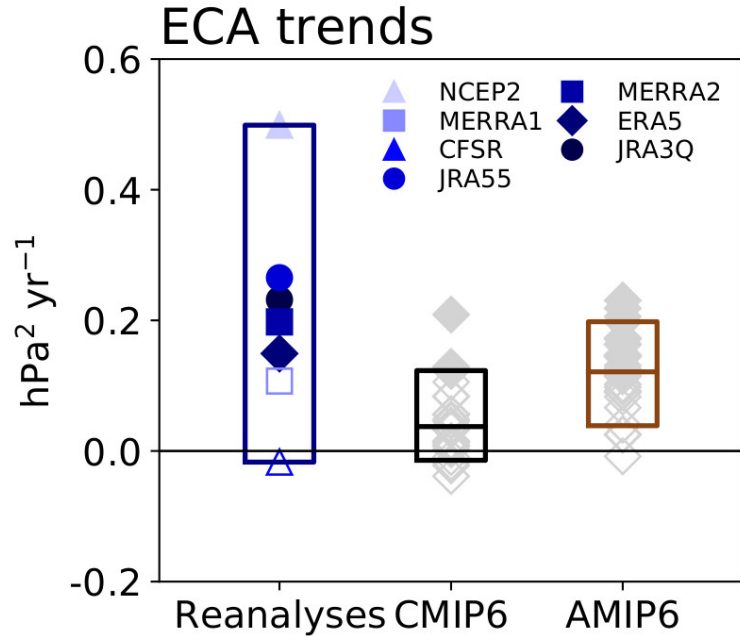

Figure S3: **Storminess trends quantified by sea-level pressure variance.** Same as Fig. 1a, but storminess is quantified using 24-hour sea-level pressure (SLP) variance:  $ECA = \frac{(\overline{SLP(t+24)} - \overline{SLP(t)})^2}{\overline{SLP(t+24)} - \overline{SLP(t)}}$ . SLP from ERAI was unavailable at the time of writing.

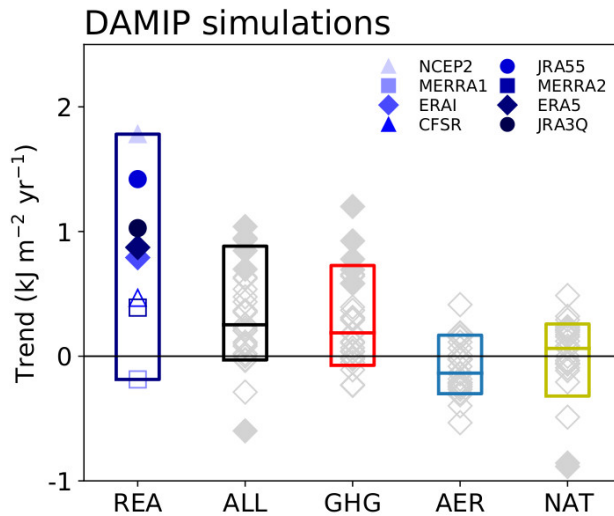

Figure S4: **Attribution of SH winter storminess trends.** Similar results to Fig. 1a, but for the DAMIP simulations. ALL, GHG, AER, and NAT refer to all forcing (historical and SSP2-4.5), greenhouse gas forcing (hist-GHG), anthropogenic aerosol forcing (hist-aer), and natural forcing (hist-nat). Storminess trends from ACCESS-ESM1-5 (3), CanESM5 (9), FGOALS-g3 (1), IPSL-CM6A-LR (6), MIROC6 (3), MRI-ESM2-0 (5) models are used where the numbers in parenthesis indicate the number of ensemble members used.

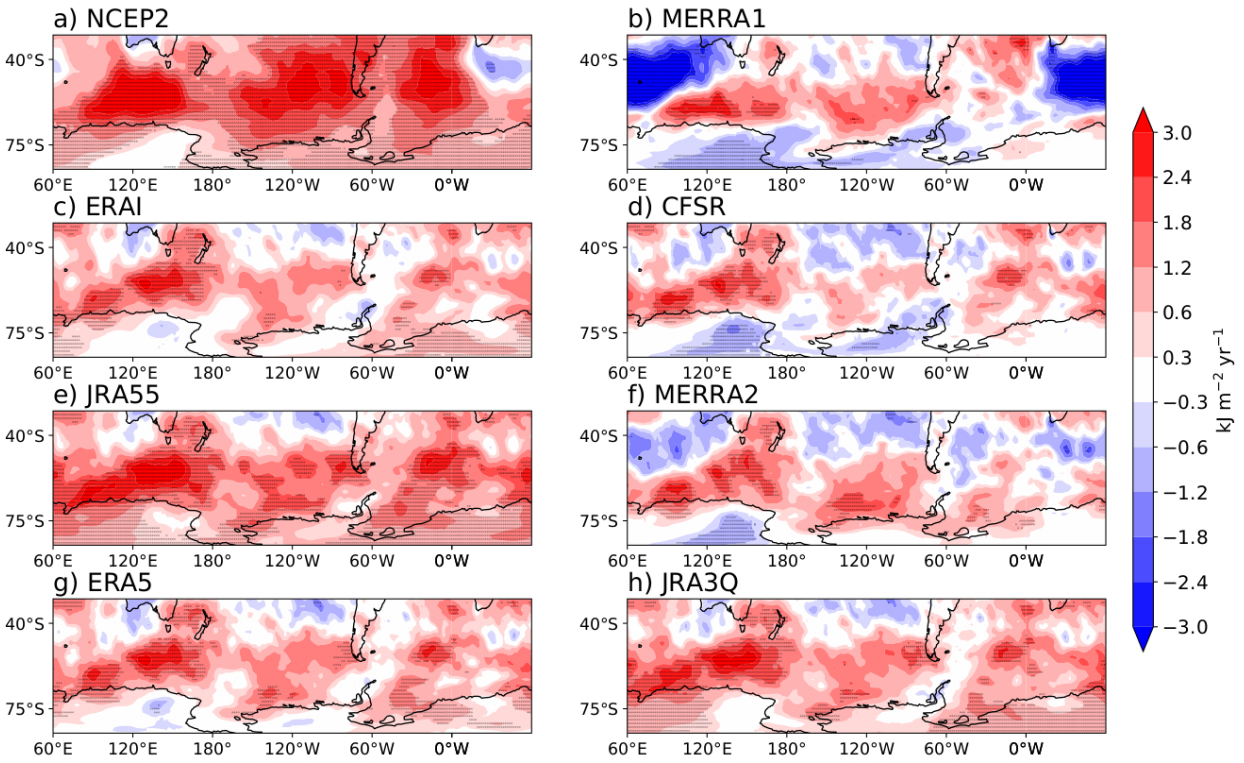

Figure S5: **Spatial pattern of storminess trends in individual reanalysis.** Spatial pattern of JJA storminess trends from 1979 to 2018 for **a** NCEP2, **b** MERRA1, **c** ERAI, **d** CFSR, **e** JRA55, **f** MERRA2, **g** ERA5, and **h** JRA3Q. Stipples indicate trends that are significant at the 95% confidence level.

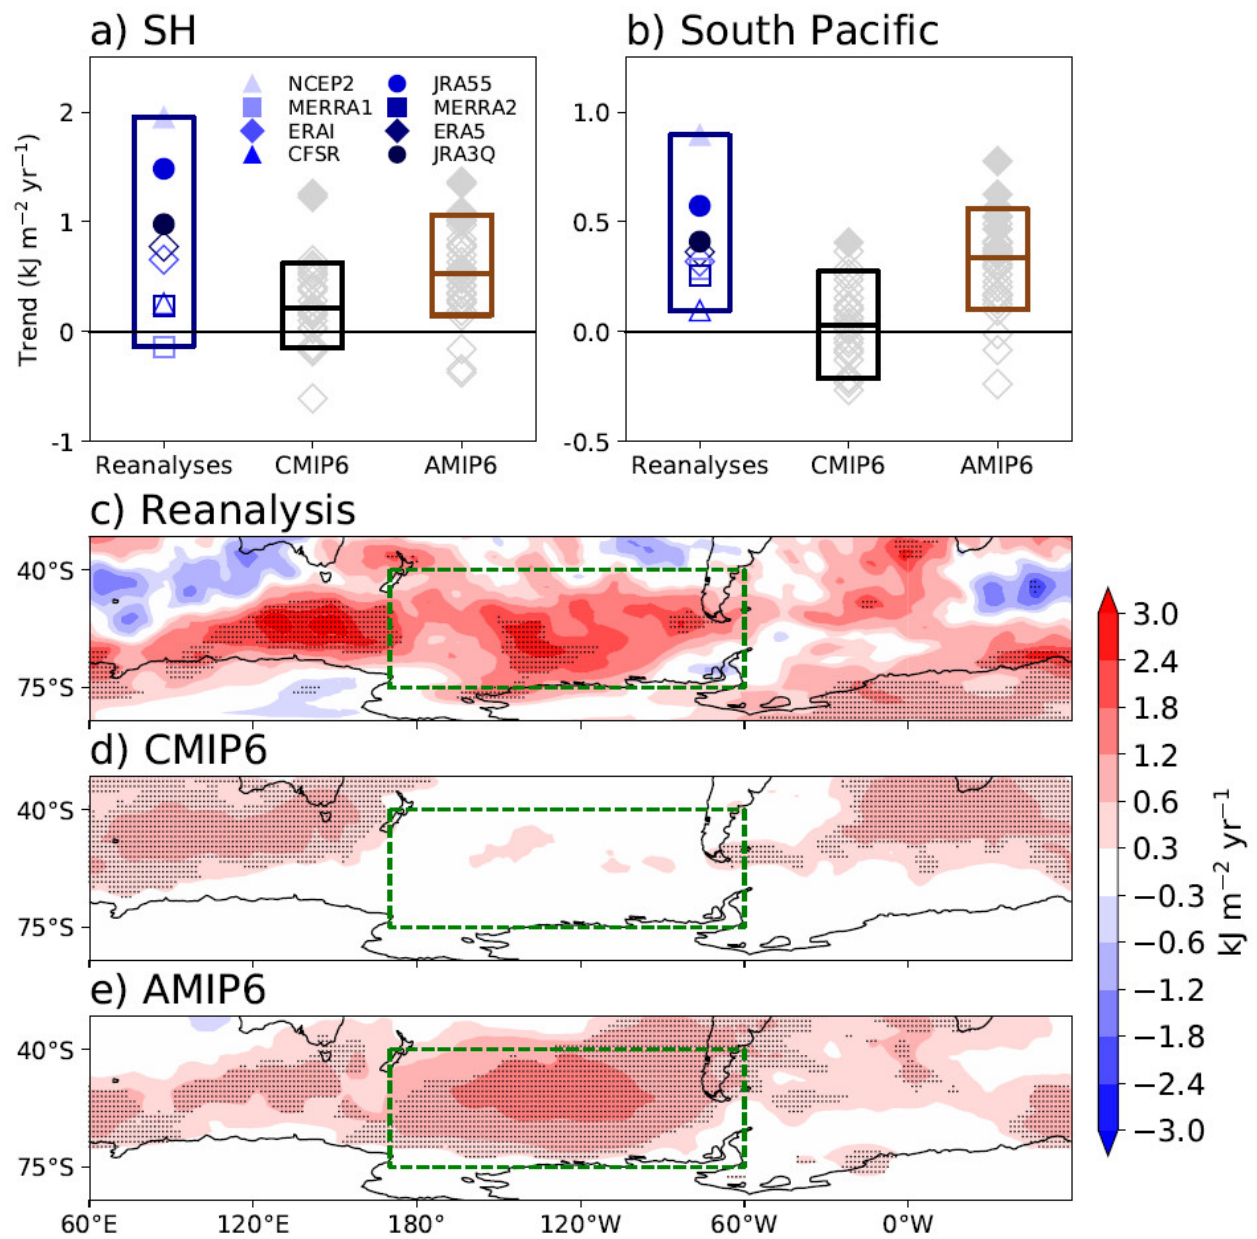

Figure S6: **Robustness to time period.** Same as Fig. 1, but trends from 1979 to 2013 as in Fig. 2.

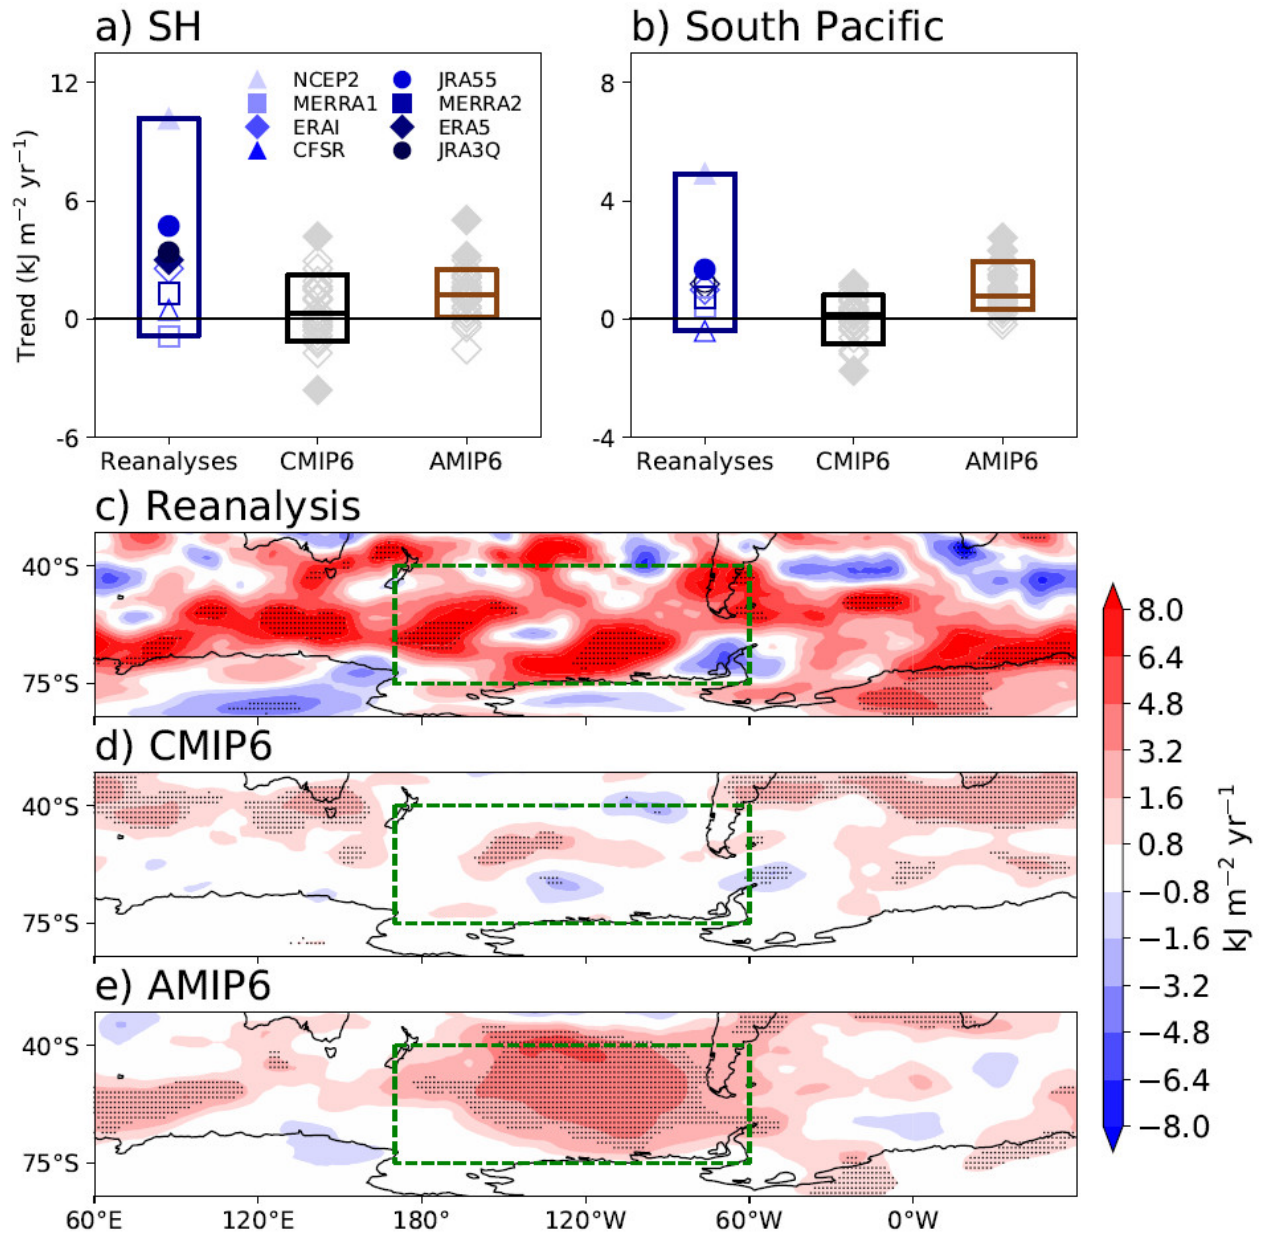

Figure S7: **Robustness to EKE definition.** Same as Fig. 1, but EKE is calculated from deviations from monthly mean. Trend is calculated from 1979 to 2013.

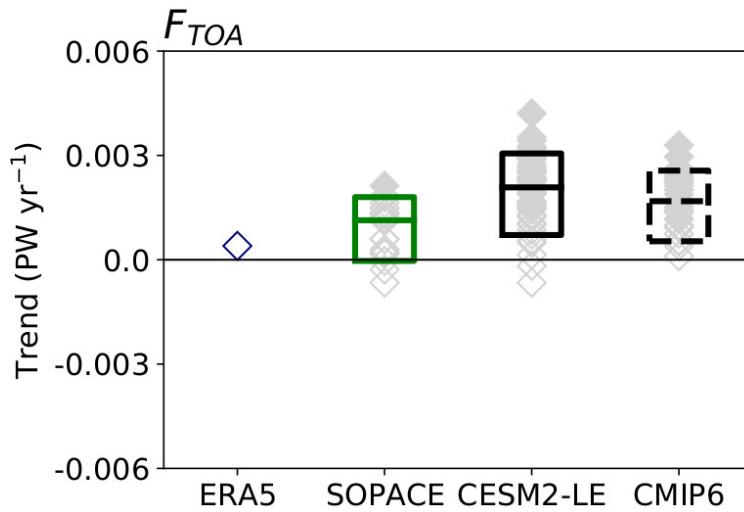

Figure S8: **Top-of-atmosphere radiation strengthens SH winter storminess.** Similar results to Fig. 5b, but for  $F_{TOA}$ .

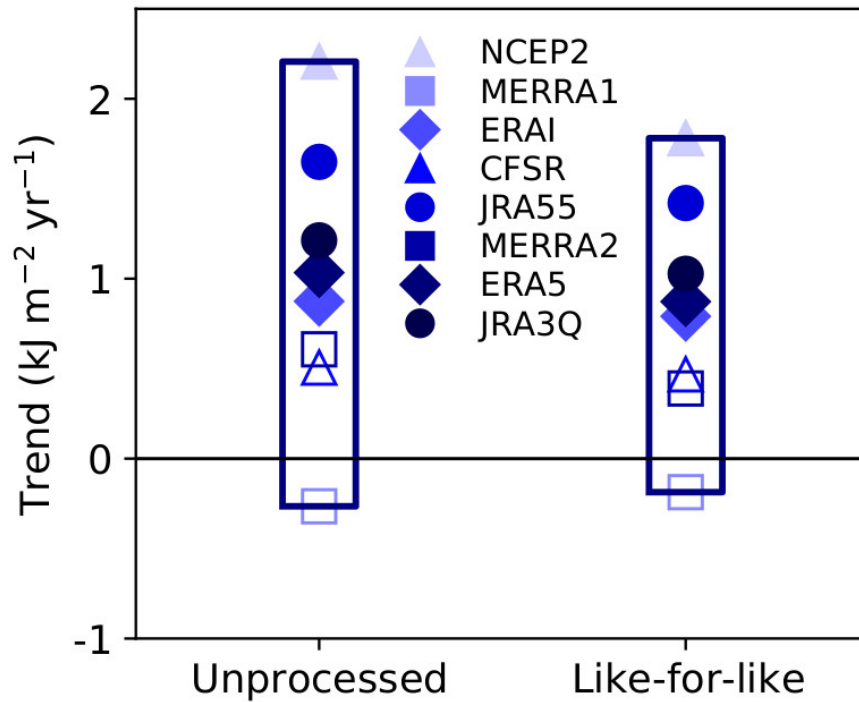

Figure S9: **Impact of like-for-like calculation.** Linear trends of SH JJA EKE (40–75°S) in 8 reanalysis datasets (blue colors, 1979–2018) calculated in unprocessed and like-for-like time and spatial grids. Statistically significant trends at the 95% confidence level are filled. The box represents the full spread of reanalysis trends.

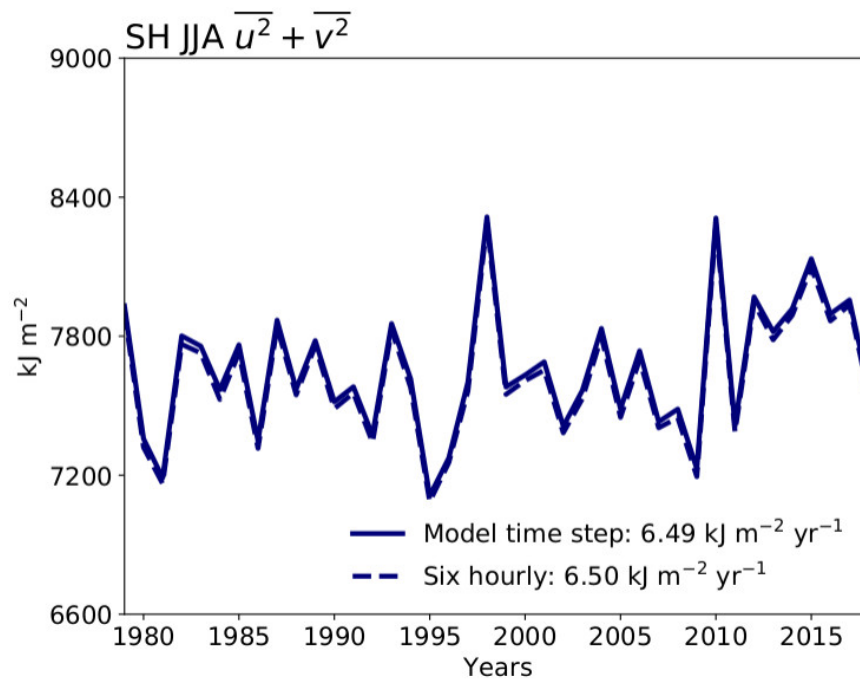

Figure S10: **SH kinetic energy in ERA5.** Timeseries of SH JJA (40–75°S) vertically integrated kinetic energy calculated from model time step (solid) and six-hourly time step (dashed) from ERA5. Linear trends from 1979 to 2018 are also denoted.
